# Supplementary material for: Delta Procalcitonin Is a Better Indicator of Infection Than Absolute Procalcitonin Values in Critically Ill Patients: A Prospective Observational Study
Source: Hindawi journal article supplement (doi:10.1155/2016/3530752), 2016-01-01
Supplement: f1 [file 3530752.f1.pdf]

## Supplemental Digital Content

**Table S5** Source of infection

| <b>Source</b>          | <b>n</b>  | <b>%</b>   |
|------------------------|-----------|------------|
| Abdominal              | 11        | 12,5       |
| Central nervous system | 5         | 5,68       |
| Genitourinary tract    | 5         | 5,68       |
| Intravascular catheter | 5         | 5,68       |
| Lung                   | 54        | 61,36      |
| Soft tissue            | 6         | 6,82       |
| Unknown                | 2         | 2,27       |
| <b>Total</b>           | <b>88</b> | <b>100</b> |

**Table S6** Samples from the Infection group

| <b>Sample</b>              | <b>Total</b> | <b>Positive</b> | <b>Negative</b> |
|----------------------------|--------------|-----------------|-----------------|
| BAL                        | 5            | 4               | 1               |
| Blood culture              | 117          | 72              | 45              |
| Catheter tip               | 5            | 4               | 1               |
| CSF                        | 16           | 16              | 0               |
| Intra-abdominal            | 4            | 3               | 1               |
| Nose                       | 4            | 1               | 3               |
| Permanent urinary catheter | 18           | 4               | 14              |
| Pleural fluid              | 3            | 3               | 0               |
| Skin                       | 2            | 0               | 2               |
| Throat                     | 1            | 0               | 1               |
| Tracheal aspiration        | 68           | 58              | 10              |
| Urine                      | 16           | 14              | 2               |
| Wound                      | 22           | 20              | 2               |
| <b>Total</b>               | <b>281</b>   | <b>199</b>      | <b>82</b>       |

BAL - bronchoalveolar lavage, CSF – cerebrospinal fluid

**Table S7** Pathogens from the infection group

| <b>Pathogenes</b>                 | <b>Sample</b>       | <b>n</b> |
|-----------------------------------|---------------------|----------|
| <i>Acinetobacter baumannii</i>    | tracheal aspiration | 2        |
| <i>Acinetobacter haemolyticus</i> | blood culture       | 1        |
| <i>Acinetobacter</i> spp.         | wound               | 1        |
| <i>Arcanobacterium bernardiae</i> | intra-abdominal     | 1        |
| <i>Bacillus cereus</i>            | CSF                 | 1        |
| <i>Bacillus</i> spp.              | blood culture       | 2        |
|                                   | blood culture       | 1        |
| <i>Candida albicans</i>           | intra-abdominal     | 1        |
|                                   | tracheal aspiration | 7        |
|                                   | blood culture       | 1        |
| Candida non-albicans              | tracheal aspiration | 8        |
| <i>Clostridium perfringens</i>    | BAL                 | 1        |
| <i>Clostridium</i> spp.           | wound               | 1        |
| <i>Comamonas testosteroni</i>     | blood culture       | 1        |
| <i>Eggerthella lenta</i>          | intra-abdominal     | 1        |
|                                   | blood culture       | 3        |
| <i>Enterobacter aerogenes</i>     | tracheal aspiration | 2        |
|                                   | blood culture       | 1        |
|                                   | catheter tip        | 1        |
| <i>Enterobacter cloacae</i>       | intra-abdominal     | 1        |
|                                   | tracheal aspiration | 5        |
|                                   | wound               | 1        |
|                                   | blood culture       | 6        |
|                                   | intra-abdominal     | 2        |
| <i>Enterococcus faecalis</i>      | urine               | 2        |
|                                   | wound               | 2        |
|                                   | blood culture       | 3        |
| <i>Enterococcus faecium</i>       | intra-abdominal     | 1        |
|                                   | PUC                 | 1        |
|                                   | blood culture       | 4        |
|                                   | intra-abdominal     | 3        |
| <i>Escherichia coli</i>           | PUC                 | 3        |
|                                   | tracheal aspiration | 6        |
|                                   | urine               | 7        |
| <i>Filamentous fungi</i>          | nose                | 1        |
| <i>Finegoldia magna</i>           | wound               | 1        |
| <i>Fusobacterium</i> spp.         | pleural fluid       | 1        |
| <i>Gemella morbillorum</i>        | wound               | 1        |
|                                   | blood culture       | 1        |
| <i>Geotrichum capitatum</i>       | urine               | 1        |

---

|                                      |                     |    |
|--------------------------------------|---------------------|----|
| Gram + not identified coccus         | blood culture       | 2  |
|                                      | blood culture       | 3  |
| <i>Haemofilus influenzae</i>         | tracheal aspiration | 4  |
|                                      | blood culture       | 1  |
| <i>Klebsiella oxytoca</i>            | tracheal aspiration | 2  |
|                                      | wound               | 1  |
|                                      | BAL                 | 1  |
|                                      | blood culture       | 2  |
| <i>Klebsiella pneumoniae</i>         | intra-abdominal     | 1  |
|                                      | CSF                 | 1  |
|                                      | tracheal aspiration | 1  |
|                                      | wound               | 2  |
| <i>Kocuria rhizophila</i>            | blood culture       | 1  |
| <i>Lactobacillus</i> spp.            | wound               | 1  |
|                                      | tracheal aspiration | 1  |
| <i>Morganellamorganii</i>            | urine               | 1  |
|                                      | wound               | 1  |
| MRSA                                 | blood culture       | 4  |
| <i>Neisseria meningitidis</i>        | tracheal aspiration | 1  |
|                                      | pleural fluid       | 1  |
| <i>Parvimonas micra</i>              | wound               | 1  |
| <i>Peptostreptococcus anaerobius</i> | wound               | 1  |
| <i>Prevotella melaninogenica</i>     | wound               | 1  |
| <i>Propionibacterium acnes</i>       | BAL                 | 1  |
| <i>Proteus mirabilis</i>             | intra-abdominal     | 1  |
|                                      | wound               | 2  |
|                                      | blood culture       | 2  |
|                                      | catheter tip        | 1  |
|                                      | intra-abdominal     | 1  |
| <i>Pseudomonas aeruginosa</i>        | CSF                 | 1  |
|                                      | tracheal aspiration | 4  |
|                                      | urine               | 3  |
|                                      | wound               | 1  |
| <i>Raoultella ornithinolytica</i>    | tracheal aspiration | 1  |
| <i>Serratia marcescens</i>           | tracheal aspiration | 2  |
|                                      | BAL                 | 1  |
|                                      | blood culture       | 6  |
| <i>Staphylococcus aureus</i>         | catheter tip        | 1  |
|                                      | tracheal aspiration | 8  |
|                                      | wound               | 2  |
| <i>Staphylococcus epidermidis</i>    | blood culture       | 18 |
| <i>Staphylococcus haemolyticus</i>   | intra-abdominal     | 1  |

---

|                                     |                     |   |
|-------------------------------------|---------------------|---|
|                                     | blood culture       | 4 |
| <i>Staphylococcus hominis</i>       | cathete rtip        | 1 |
|                                     | CSF                 | 1 |
| <i>Stenotrophomonas maltophilia</i> | blood culture       | 1 |
|                                     | tracheal aspiration | 1 |
| <i>Streptococcus agalactiae</i>     | tracheal aspiration | 1 |
| <i>Streptococcus equinus</i>        | intra-abdominal     | 1 |
| <i>Streptococcus mitis</i>          | blood culture       | 3 |
| <i>Streptococcus pneumoniae</i>     | blood culture       | 1 |
|                                     | tracheal aspiration | 2 |
| <i>Streptococcus</i> spp.           | intra-abdominal     | 1 |
| <i>Streptococcus</i> type C         | pleural fluid       | 1 |

CSF – cerebrospinal fluid, BAL - bronchoalveolar lavage, PUC - Permanent urinary catheter, MRSA - Methicillin-resistant *Staphylococcus aureus*
